# Supplementary material
Source: PubMed Central journal article supplement (PMC3709836)
Supplement: NIHMS380827-supplement-1.pdf [file NIHMS380827-supplement-1.pdf]

## Online resource 1a. Alignment of cytoplasmic Ig-like domains of *Xenopus* B7H6

### Cytoplasmic Ig-like domain-1 (Ig)

AAI66200 LKKEPPKLSPIITGAEHLVHMNEATLSCQISGFRPKPIRITLCLQRKGGEVMEIYSWDSEAQTDH----SIKRKELSVPIEL  
AAH84632 Y..VA.....R.....L.....W.K.N...E...D...T..GSSAPV.HH.E.QRVV.VP

AAI66200 EREGLVGNGE--TNLPPTQRALRVEMVPLIKTSKKHISNCQCTIRITPDIEEDDGAELTVRVTHSALRGPISVSCRLKVNIGV  
AAH84632 .....MS..NG....A..P.Q....V.TSKSQRL.....H...N.....L.....G..

### Cytoplasmic domain-2 (C1)

AAI66200 PPTISDIVPPLRILNEEPVTLTCPINGFKPKPLSVTWLKVDSGGRETELLSWDRGSTNIRDP  
AAH84632 K.KLAK.IS..H..HG..L...Y.....QR.....Q.T...N..

AAI66200 KYSHQMLN--EHGEHS-----NAFISVLAMKPTVKEDHGAKYICRTYHYATGSQADKTMEMLVS  
AAH84632 ...-LA.DER.K...EEEDDI.Y.V.N.TL.....Y...Q.V...H..T.EHT.E.R.K.Q.L

### Cytoplasmic domain-3 (C1)

AAI66200 AVPELGPIQKSPEILYVGEEMTLCRIHSHFHPPEPLKVRWYKGDLELESSTD  
BX732750 .....N.....G.C.....A....  
AAH84632 S....D..ENA..V....D..K.....RT.D.S...EN...S.YN.

AAI66200 QAHRGASHLLDCTS R ATYRPSVRDIGKSFRCVSHESLQHPKCVSWELKHL  
BX732750 .....N.....  
AAH84632 PILHNN.G.FHF...T..T.C.....T.....PT..N.....Y.

### Cytoplasmic domain-4 (Ig)

AAI66200 VSEPRVSAIKCHPEAPECNQPATLSCAIENYYPKDLKIRWYRGLEVISSHN  
BX732750 I.....V.....V.T.Q.....K...ID.  
AAH84632 I.....D..V.G...TT...D..KF.....W....K.EG

AAI66200 DTETKEDPPGSGFLFSKMTEIHLTPTHSDHGTEFHMEIIHNMKITKKTFCLOQFKG  
BX732750 .PKAA.EDQE.....RTS..QII..IN.....YLK.T.G..NFE.N.PMKLR.  
AAH84632 .P.GAKED.E.....RT...QII..IN...KQ.L.....F..Y...-SMKC..

### Cytoplasmic domain-5 (C1)

AAI66200 FPEVKDITCNKYPPKYGEALTLSCFVIGCSARDITAEWREGNNPIRGQMRAPQI  
BX732750 L.D..E.....V.....KRE.E.KT..  
AAH84632 -----

AAI66200 DRDSVTFLLTLTPAEHYGKLLTCLIKHKDLQPPIKKNISLKL  
BX732750 ....I.....H...F.....R.I.C...L  
AAH84632 -----S...F.....E.....E.....

## Online resource 1b. Deduced amino acid sequence of B7HXen.

### Leader

AAH85212 MVSRLFLLLLLLLLRIAI  
AAI61104 MGDPGGAAVLLRFLRIQGFLLCLFLLPQT

### Extracellular V domain

AAH85212 FSALEMTAPPHTHRAEMGSNIIPCTFRVDEPPVDLKFLLAIWVHFQDKEVLNYTNTSLV  
AAI61104 GSVLEVIARSPHVAQKGSNTLIPCTFRVNFKFPADPKFLAIYWDFNGRRILTYDN--VV

AAH85212 STQNPRLSLNKDDTTEDGVASLIISNVTISDGGLYRCRVLYSPKHYKEVRLDIQ  
AAI61104 STTDPRFSLDPSSAPRGEASLSVSNQAISDGGAYSCSVTYSPEQQQKEITVEIQ

### Extracellular Ig domain

AAH85212 APPQITITNKVLIKDKESVLSASITRFYFVDIDIKWLRDGKILAGVILLTPQRNVDTG  
AAI61104 APPQITITNRVVTENKESALRASIIIGFYFQDLQDVTWLRDGAILRGVTMKNPQRDPDGT

AAH85212 YQVNNYMTIVPTEENRKQNFSIWVQHESSLSPLEQEDFQLIYG  
AAI61104 HSTTSAVTIVPTEGNRNQNF SIRVQHESSLVPLQEDFQLLYA

### Extracellular C domain

AAH85212 AAPSIHITHQLFHLHREQELVLCQAWGFYFESIVMNWFLNGSHVETANRKTVNSSAVES  
AAI61104 AAPSIHISHGFSFYVNEEQTLMCRVWGYYPEDIAVSWFLNGSRVEPSEIKRINSSALEL

AAH85212 IYRILPTDQNWGMEISCEVEHQTLRSPLVEKLLILGN  
AAI61104 PYRFLPTAESQGMEISCVVEHRALTEPLVQSLKVELT

### TM region

AAH85212 DGKVKHRAVVL<sup>1</sup>SLA<sup>2</sup>ILSV<sup>3</sup>IITFTLISLFLWRKFSSPK  
AAI61104 DAQWSNTLIIPIAIVVVALVAVVAVLILKKKKRCCIRK

### Cytoplasmic domain-1 (Ig)

AAH85212 APELLGPIEYSLCGAEEIQYSLNLQNFYPRDINIKWTYGERNEKVNTSSNKFIRTAG  
AAH85212 KTF<sup>1</sup>SVVSECRIPWHQY<sup>2</sup>TMRV<sup>3</sup>IWEHETLAE<sup>4</sup>PQYREVRVT

### Cytoplasmic domain-2 (C1)

AAH85212 DLPWRPVMSQILTPDVYVGTEAEIQCNISGYFPDKLTVTWYKKKENGKEELVNNGGRY  
AAH85212 QIPDIQSQYQPDWTLTCTARLLFSPSLTEEHGTQFICRVKHPSLGEEIERRTGTLYVR

### Cytoplasmic domain-3 (Ig)

AAH85212 ARPKVSKFRMAGEWGLSLEAEGFFPRDIGFSWEVVQGNKRDVTSLPCEFSISENTDGT  
AAH85212 YKATSTCHCLKDQLN<sup>1</sup>YLHTLRVSVQHEALGAPVCKDITQ

### Cytoplasmic domain-4 (C1)

AAH85212 DFPWRPQVGEIVVPELIELEETQLTCNISNYFPDALTVTWFIKNKESEELTDVTQYIR  
AAH85212 YRHDTVSQYQPDQTLTCTTSLTFSPSLGMDLGAEFICRVKHPSLGEEIERRTGTLYVR

### C-terminus domain?

AAH85212 GGPTSLSP\*

## Online resource 1c. Alignment of V-IgSF domain of *Xenopus* B7H6

```

AAI66200      DALGVKTSDVPIKSQRNQEAFIPCTVTDYGAGRVDPKLLSVEWKLKPLNGSEEQVYLYVS 60
1420-1        .....P.....I.....V..... 60
707-5         ...ITMGGSLVNAL.AHDV...I.G.S--EL.LTK...T.T.SNKAATNQL..KFL. 58
707-2         GS.RIEMGAE.V..L..E.....S...W.P.DIS.PK....TQRT.D.R.G..... 60
707-4         GS.R.EMGAE.V..L..E.....S...W.P.DIS.PK....AQ.T...KG..... 60
AAH84632      .T.....F...FL.....EL.V..F.F...M.TM...DK..... 60
AAH82995      E.VE..V..S.V.VLKD.DV...ISR.SSTEL.LQR...Q.I.----.D-P..I.DG 55

AAI66200      GTPTPTRPGSYIS-RDLITGNVGLHLPRVQFTDEGEYTCVIYTPNKAVGHSVLQVS 116
1420-1        ..H.....-S.....W.Q..... 116
707-5         QS.Q.....D.....A.....F..D..M.E..... 115
707-2         ..R.....D.....Q..... 117
707-4         ..H.....D.....Q..... 117
AAH84632      ..H.....DSEI.R..A.....F...V...T... 117
AAH82995      .SHN.I...QLD-IH..K..A..Y.AQ..VAE.....T.DNEEDE.R.S.E.. 111

```

## Online resource 1d. Alignment of V-IgSF domain of *Xenopus* B7HXen

```

AAI61104      GSVLEVIARSPHVAQKGSNTLIPCTFRVNKFPADPKFLAIYWDFNGRRILTYDNI 55
1657-1       .....T.P.....D.....IDP.....L.N.K.N...QIR.SCTDSE-- 55
1146-1       .....T.P.....D.....IDP.....L.N.K.N...QIR.SCTDSE-- 55
1146-2       VA...S.PLTQISM...D.....IDP.....L.D.K.H...QIRE..SDKV-- 56
1119-1       .AA..LT.PPT.R.TL.AD.....ETP.V..RH...F.Y.QDKE..NVTTT--- 55
1119-2       .AA.DLTVPPS.R.RV..D.S.....LDRRSV...L.T.S.Y.QD.E..RFPGT--- 55
1119-3-1     .AA..LM.PPT.R.TL.AD.....ETP.V..RH.G.F.Y.QDKE.FNVIST--- 55
1119-3-2     -DA.LIGDEE.PT.TL..DVIL...S.GQP-VSLQY...L.T.QNKMLFRL.NK--- 54
1119-4       .AA..LM.PPT.R.TL.AD.....ETP.V..RH.G.F.S.QDKE.FNVIST--- 55
867-1       C.A...TVPPNQSSPM.RDA.L.....DNP.MN.....L.H.GDKEV.R...K--- 55
867-4       C.A...TVPPDQSSPM.RDA.L.....DNP.MN.....L.H.GDKEV.R...K--- 55
867-5       C.A.K.SDPPS.K.LL..TASL...SLG.S.I.HSA.S.I.T.RDKE..R.NKG--- 55
867-7       .A.K.SDPPS.K.LL..T.SL...SLG.S.INHSA.S.I.T.RDKE..R.NKG--- 55
867-9       -.....F.PPTQQTLL...V.L...Q.ENSQIL.NF..VF.YIGDKE.VR.DNKG-- 54
3534-1     .AA..LM.PPT.R.TL.AD.....ETP.V.SRH...F.Y.QDKE..NVIST--- 55
1318-3     .I.DIS.P..QRVLL.NEAQLR...SLA.P.IN.L...VF.Y.QDME..R...K--- 55
1318-2     .AT.QLA.PPSRQVLV..RAIL..MIS.GNASL.LNY.VVI.F.QNKE..RF..K--- 55
1318-1     .TT.QLA.PPSRQVLV..RAIL..MIS.GNASL.LNY.VVI.F.QNKE..RL..K--- 55
1146-3     .AE...Q.PPA.TVTL..DVTL..S.S.GPTQV.LQY.T.L.Y.QDTE..FFNAH--- 55
1707-2     .AE...Q.PPA.TVTL..DVTL..S.S.GPTQV.LQL...L.Y.QDTE..VFNAHGS 58
AAH85212    F.A..MT.PPT.R.EM...II.....DEP.V.L.....I.H.QDKEV.N.T.TSL- 57
Hagfish     ICG.K.ESP.EVGFVD.K.VSL..I.T..DHSEPIDLSKLELEWTNGHAILTYKNGKI 58

AAI61104      VSTTDPRFLDPSSAPRGEASLSVSNQAISDGGAYS SVTYSPEQQQKEITVEIQ 110
1657-1       .....N.....T.....GT.W.E..RL... 110
1146-1       .....N.N..LL.....T.....GT.W.E..RL... 110
1146-2       E.....F..N..W.....T.....GTDW.E.KTIL... 111
1119-1     .GSSN..L..NRDTIRA.V...IA.VE...L.R...L...DRRY..VRLD.. 110
1119-2     .GAPN..L..NKDTTKD.V...LTGVR...L.K...GHGF.RSE...RLD.. 110
1119-3-1    .GSSN..L..NRDTIRA.V...IA.VE...L.R...L...DRRY..VRLD.. 110
1119-3-2    GKQLS..VTFSDAD.MK.I..VQLH.VSVA.A.I.M.KII...KKE.D..LKV. 109
1119-4     .GSSN..L..NRDTIRA.V...IA.IE...L.R...L...DMRY..VRLD.. 110
867-1     GKVSS..V.I.ERALLE.N...L.VTV...T.R...I...T.K...RLR.H 110
867-4     GKVSS..V.I.ERALLE.N...L.VTV...T.R...I...T.K...RLR.H 110
867-5     RTLSQA.L...AQAIEE.RV...V.VTV..E.T.T.V.S.NM-K.EQGVKL.VA 110
867-7     RTLSQA.L...AQAIEE.RV...V.VTV..E.T.T.V.S.NM-K.EHVMELQVE 110
867-9     K.ISHS.VTA.EKGFPQ.N..ITL..VA...Q.T.R.LIIH..SRKE.D...KV. 109
3534-1     .GSSN..L..NRDTI.A.V...IA.IE...L.R...L...NRRY..VRLD.. 110
1318-4     GLSLS..V.FSKEA.NN.DV.V.LA.VS...I.R.L.I...KME..VLL..F 110
1318-2     CFSSTS.R.FEQQEVND.NF..AL..VRS..E.V.T.A.V...REDR.IRLIVL 110
1318-1     CFSSTS.R.FEQQEVND.NF..AL..VRS..E.V.T.A.V...RED..IRLNVL 110
1146-3     GKES..VTIRED.GK.I...HLAQIRL.A.L.K.L.I.I.RSHT..VQLTVH 110
1707-2     KEESE..VTIRED.GK.I...HLAQIRL.A.L.K.M.I.I.RSHT..VQLTVH 113
AAH85212    ...QN..L..NKDTTEDGV...II..VT...L.R.R.L...KHY..VRLD.. 112
Hagfish     ETSSSFKGRVMNEQNLRNGDA.LILNNVTEVDMLT.I...NG.TRRDT.ILOQYK 113

```

### Figure legend:

a) Alignment of cytoplasmic Ig-like domains of *Xenopus* B7H6 EST sequences. Cytoplasmic Ig-like domains are determined based on the exon-intron organization from genomic sequences. b) Deduced amino acid sequence of full-length EST sequences for *X. laevis* B7HXen. Only the extracellular domains of AAI61104 (*X. tropicalis*) are shown since there is no obvious cytoplasmic Ig domain in this sequence. Domains are predicted based on the sequence similarity to other sequence and exon assignment from *X. tropicalis* genome. c) The deduced amino acid sequences of V-IgSF domains of B7H6 are retrieved from the *Xenopus* genomic scaffolds and aligned with EST sequences. d) The deduced amino acid sequences of V-IgSF domains of *X. tropicalis* B7HXen are retrieved from scaffolds and aligned with EST sequences. The membrane distal V-IgSF of Hagfish IgSF3 sequence was aligned. Gaps and identical aa residues are indicated with dashes and dots, respectively. Canonical amino acids characteristic for IgSF domains are highlighted in grey and predicted TM regions are underlined.
