# Supplementary material
Source: PubMed Central journal article supplement (PMC3709836)
Supplement: NIHMS380827-supplement-2.pdf [file NIHMS380827-supplement-2.pdf]

Online resource 2. Genomic coordinates of *B7H6* and *B7HXen* in the *Xenopus* scaffolds

**B7H6**

Scaffold-707 (535,221bp)

| Gene ID | Position      | Protein ID | number of IgSF domains | EST <sup>1</sup>                                                                                  |
|---------|---------------|------------|------------------------|---------------------------------------------------------------------------------------------------|
| 707-1   | 33133-40802   | 101494     | 5                      | BX745260 (tadpole embryo),DN082733 (lung)+DN055944 (kidney),<br>BX732750 (tadpole stg 35-40) etc. |
| 707-2   | 45969-58046   | 397915     | 6                      | BX745260 (tadpole embryo)                                                                         |
| 707-3   | 65268-68458   | 184972     | 1                      | EL657887 (small intestine)                                                                        |
| 707-4   | 71420-96658   | 397890     | 5                      | BX745260 (tadpole embryo), CX888209 (testes)                                                      |
| 707-5   | 123639-178327 | 184975     | 15 (2 models?: 7+8)    | CX917782 (testes)                                                                                 |
| 707-6   | 194481-225600 | 184976     | 10                     | CX923745 (testes) etc.                                                                            |
| 707-7   | 243887-259814 | 397873     | 3                      | CF374995 (whole body) etc.                                                                        |
| 707-8   | 260674-294767 | 184978     | 4                      | CX996494 (intestine) etc.                                                                         |
| 707-9   | 314966-320370 | 184979     | 1                      | CF374995 (whole body) etc.                                                                        |
| 707-10  | 368340-390340 | 184981     | 4                      | CX923745 (intestine) etc.                                                                         |
| 707-11  | 415018-421374 | 397947     | 3                      | CX924635 (testes), CX923745 (intestine) etc.                                                      |
| PLEKHA7 | 507910-512028 | 397879     | -                      | mapps to human chromosome 11p15                                                                   |
| RPS13   | 530531-531763 | 88655      | -                      | mapps to human chromosome 11p15                                                                   |

Scaffold1420 (72,679bp)

|         |             |        |   |                                                                                             |
|---------|-------------|--------|---|---------------------------------------------------------------------------------------------|
| SLC6A11 | 217-5750    | 190860 | - | mapps to human chromosome 3p25.3                                                            |
| 1420-1  | 34308-52814 | 461580 | 7 | CX888807 (testes),CX913047 (testes),CX900575 (testes),CX888664 (testes),<br>DN082435 (lung) |

Online resource 2. Genomic coordinates of *B7H6* and *B7HXen* in the *Xenopus* scaffolds

**B7HXen**

Scaffold-1119 (167,738bp)

| Gene ID | Position      | Protein ID | number of IgSF domains | EST <sup>1</sup>                                                                                                                                                                                                                                                                                                                                  |
|---------|---------------|------------|------------------------|---------------------------------------------------------------------------------------------------------------------------------------------------------------------------------------------------------------------------------------------------------------------------------------------------------------------------------------------------|
| 1119-1  | 7713-27883    | 189479     | 9                      | CX923462 (testes),CX828489 (brain),EL662685 (small intestine),<br>CX976768 (intestine)                                                                                                                                                                                                                                                            |
| 1119-2  | 43003-82565   | 461214     | 13                     | CX805381 (brain),CX797364 (brain),CX798692 (brain),CX795849 (brain),<br>CX798948 (brain),                                                                                                                                                                                                                                                         |
| 1119-3  | 83902-140637  | 189481     | 17                     | CX812473 (brain), CX923462 (testes), CX888371 (testes), CX899439 (testes),<br>CX820566 (brain), CX828489 (brain), CX900620 (testes),<br>EG577962 (whole embryo stg 56-62), EB475845 ( whole embryo stg 56-62),<br>CX802600 (brain), EB484038 (spleen), CX820565 (brain),<br>EL659223 (small intestine), CX905208 (testes), CX810694 (brain), etc. |
| 1119-4  | 164692-167692 | 189482     | 2                      | CX923462 (testes), DN057478 (kidney), CX828489 (brain)                                                                                                                                                                                                                                                                                            |

Scaffold-867 (337,695bp)

|        |               |        |    |                                                                                                                                                              |
|--------|---------------|--------|----|--------------------------------------------------------------------------------------------------------------------------------------------------------------|
| 867-1  | 17572-57917   | 407771 | 8  | CX842746 (brain), DN015523 (heart), EL661102(small intestine)                                                                                                |
| 867-2  | 104292-110592 | 460532 | 4  | EL655865 (small intestine),CX905130 (testes),                                                                                                                |
| 867-3  | 116712-125454 | 187169 | 4  | EL699109 (Limb), CX854937 (brain), DN077598 (lung),<br>EL661102 (small intestine)                                                                            |
| 867-4  | 127833-188870 | 460533 | 10 | CX842746 (brain), AAI68128 (testes)                                                                                                                          |
| 867-5  | 196341-211233 | 187171 | 6  | DR836487 (fat body), DR834196 (fat body), CX999510 (heart),<br>EG653999 (small intestine), DN015523 (heart), CX912262 (testes),<br>DN059149 (fat body), etc. |
| 867-6  | 265545-280100 | 187173 | 3  | EG653999 (small intestine), CX912262 (testes), DN015523 (heart)                                                                                              |
| 867-7  | 284326-296678 | 187174 | 3  | DR836487 (fat body), DR834196 (fat body)                                                                                                                     |
| 867-8  | 296678-312149 | 187174 | 3  | CX924660 (testes), CX920068 (testes), CX915279 (testes), CX811079 (brain)                                                                                    |
| 867-9  | 313339-322098 | 187174 | 2  | CX903340 (testes), CX807560 (brain), CX886240 (testes), CX924661 (testes)                                                                                    |
| 867-10 | 332423-336387 | 460534 | 1  | CX924660 (testes), CX920068 (testes), CX915279 (testes),<br>EL655892 (small intestine), CX811079 (brain)                                                     |

Online resource 2. Genomic coordinates of *B7H6* and *B7HXen* in the *Xenopus* scaffolds

Scaffold-3534 (11,245bp)

|        |           |        |   |                  |
|--------|-----------|--------|---|------------------|
| 3534-1 | 1894-8537 | 192957 | 3 | CX828489 (brain) |
|--------|-----------|--------|---|------------------|

Scaffold-1318 (98,102bp)

|        |             |        |   |                                                                                                                                                                                |
|--------|-------------|--------|---|--------------------------------------------------------------------------------------------------------------------------------------------------------------------------------|
| 1318-1 | 10875-14000 | 190460 | 1 | CX995964 (intestine), CX983522 (intestine), CX979602 (intestine), CX975809 (intestine), CX979601 (intestine), CX983521 (intestine), CX995963 (intestine), CX975808 (intestine) |
| 1318-2 | 14000-19000 | 190460 | 2 | all ESTs in 1318-1<br>EL699109 (limb), DN077598 (lung), DN077598 (lung), CX854937 (brain)                                                                                      |
| 1318-3 | 19000-34186 | 190460 | 7 | EL659466, EL653181, EL663470 (small intestine)                                                                                                                                 |
| 1318-4 | 46075-70472 | 190461 | 5 | all ESTs in 867-3; EG653270 (small intestine)                                                                                                                                  |

Scaffold-1146 (154,973bp)

|        |               |        |    |                                                                                                                                                                                                                                                                                                                                                                                                                                                                                                                                                       |
|--------|---------------|--------|----|-------------------------------------------------------------------------------------------------------------------------------------------------------------------------------------------------------------------------------------------------------------------------------------------------------------------------------------------------------------------------------------------------------------------------------------------------------------------------------------------------------------------------------------------------------|
| 1146-1 | 10125-12391   | 257547 | 3  | DR879120 (skin), BX691942 (neurula), AL788752 (neurula)                                                                                                                                                                                                                                                                                                                                                                                                                                                                                               |
| 1146-2 | 64158-76640   | 461287 | 3  | DT421997 (skin), CF590382 (whole body)                                                                                                                                                                                                                                                                                                                                                                                                                                                                                                                |
| 1146-3 | 84381-101615  | 189674 | 11 | CX888371 (testes), CX899439 (testes), CX812473 (brain), CX820566 (brain), CX820565 (brain), CX905130 (testes), CX802601 (brain), EL655865 (small intestine), EL655864 (small intestine), EG651995 (small intestine), EL663892 (small intestine), CX977562 (intestine), DT401525 (oviduct), EL661154 (small intestine), CX978268 (intestine), CX978268 (intestine), EL661154 (small intestine), CX810609 (brain), EG650864 (small intestine), CX974210 (intestine), EL663892 (small intestine), EL653717 (small intestine), CX978267 (intestine), etc. |
| 1146-4 | 148521-151681 | 189677 | 1  | DN036288 (liver), DC144455 (embryo), DR879119 (skin), DT421998 (skin), DR879120 (skin) 97%, CF590382 (whole body) 94%                                                                                                                                                                                                                                                                                                                                                                                                                                 |

Scaffold-1707 (36,085bp)

|        |             |        |    |                                                                                                                                                                                                                                                                                                                         |
|--------|-------------|--------|----|-------------------------------------------------------------------------------------------------------------------------------------------------------------------------------------------------------------------------------------------------------------------------------------------------------------------------|
| 1707-1 | 7687-19898  | 191589 | 11 | EL661154 (small intestine), CX978268 (intestine), EG651995 (intestine), CX900915 (testes), CX810609 (brain), CX974210 (intestine), EL663892 (small intestine), EL653717 (intestine), CX978267 (intestine), EL707062 (limb), CX905615 (testes), CX888370 (testes), CX900914 (testes), EL707061 (limb), CX812472 (brain), |
| 1707-2 | 20880-21915 | 191590 | 1  | no EST                                                                                                                                                                                                                                                                                                                  |

Online resource 2. Genomic coordinates of *B7H6* and *B7HXen* in the *Xenopus* scaffolds

scaffold-1657 (40,156bp)

|        |             |        |   |                                                                                                                                                        |
|--------|-------------|--------|---|--------------------------------------------------------------------------------------------------------------------------------------------------------|
| 1657-1 | 13450-29812 | 191506 | 3 | CX916757 (testes), DN036288 (liver), DC144455 (embryo), DR879119 (skin), DT421998 (skin), DR879120 (skin), CF590382 (whole body), CX979669 (intestine) |
|--------|-------------|--------|---|--------------------------------------------------------------------------------------------------------------------------------------------------------|

Scaffold-2250 (20,541bp)

|        |          |        |   |                                                                                                                                                        |
|--------|----------|--------|---|--------------------------------------------------------------------------------------------------------------------------------------------------------|
| 2250-1 | 413-9768 | 192194 | 2 | DN036288 (liver), DC144455 (embryo), DR879119 (skin), DT421998 (skin), DR879120 (skin), CF590382 (whole body), CX979669 (intestine), CX916757 (testes) |
|--------|----------|--------|---|--------------------------------------------------------------------------------------------------------------------------------------------------------|

Scaffold-1405 (75,973 bp)

|        |             |        |   |                                                                                                                                                                                                                                                              |
|--------|-------------|--------|---|--------------------------------------------------------------------------------------------------------------------------------------------------------------------------------------------------------------------------------------------------------------|
| 1405-1 | 9908-23896  | 190816 | 6 | Same as 1318-2: EL653181 (small intestine), EL659466 (small intestine), EL663470 (small intestine), CX979602 (intestine), CX975809 (intestine), CX995963 (intestine), CX983521 (intestine), CX983522 (intestine), CX995964 (intestine), CX979601 (intestine) |
| 1405-2 | 66602-75451 | 472810 | 2 | EL699109 (limb), CX854937 (brain), CX854938 (brain), EL661102 (small intestine), DN077598 (lung), EG653270 (small intestine)                                                                                                                                 |

Scaffold-3782 (10,288 bp)

|        |           |        |   |                                                                               |
|--------|-----------|--------|---|-------------------------------------------------------------------------------|
| 3782-1 | 4808-9885 | 193094 | 1 | DR834196 (fat body), CX999510 (heart), DR836487 (fat body), EL674099 (thymus) |
|--------|-----------|--------|---|-------------------------------------------------------------------------------|

Scaffold-4710 (8,229 bp)

|        |           |        |   |                                     |
|--------|-----------|--------|---|-------------------------------------|
| 4710-1 | 2470-7801 | 193353 | 1 | CX828489 (brain), CX923462 (testes) |
|--------|-----------|--------|---|-------------------------------------|

<sup>1</sup> 'etc.' indicates there are many more sequences with lower than 90% nucleotide identities.
