# Supplementary material
Source: PubMed Central journal article supplement (PMC3709836)
Supplement: NIHMS380827-supplement-3.pdf [file NIHMS380827-supplement-3.pdf]

Online resource 3. Genomic coordinates of NKp30 in the Xenopus scaffolds

**Scaffold-215: 1,772,981 bp**

|        | Position (bp)   | gene symbol | Protein ID | human chr | Type <sup>1</sup> | Gene description/EST for NKp30                                                                                                                                                                                                              |
|--------|-----------------|-------------|------------|-----------|-------------------|---------------------------------------------------------------------------------------------------------------------------------------------------------------------------------------------------------------------------------------------|
| 215-1  | 29895-31362     | NKp30       | 170752     | 6p21.3    | DT                | 88% DT447366 (spleen)                                                                                                                                                                                                                       |
| 215-2  | 36219-41502     | NKp30       | 170753     | 6p21.3    | ES                | 100% ES685492 (spleen); ES685490 (eye); DR850889 (ovary); DN098981 (Ovary); CX747707 (whole embryo); AL878396 (egg); AL961664 (gastrula); DR850888 (ovary); CX747706 (whole embryo); 98% CX966132 (intestine); 95% CX445352 (whole embryo); |
| 215-3  | 54224-56880     | NKp30       | 170755     | 6p21.3    | DT                | 95% DT447366 (spleen), 96% EL837225 (testes)                                                                                                                                                                                                |
| 215-4  | 62790-67524     | NKp30*      | 170756     | 6p21.3    | DT, DT            | 91-6% DT447366 (spleen), 95-7% EL837225 (testes)                                                                                                                                                                                            |
| 215-5  | 73213-83037     | NKp30*      | 170757     | 6p21.3    | DT, DT            | 91-2% DT447366 (spleen), 97-8% EL837225 (testes)                                                                                                                                                                                            |
| 215-6  | 90642-97175     | NKp30       | 170758     | 6p21.3    | DT                | 95% DT447366 (spleen), 99% EL837225 (testes)                                                                                                                                                                                                |
| 215-7  | 131570-137052   | NKp30*      | 170763     | 6p21.3    | DT, DT            | 92-3% DT447366 (spleen), 97-100% EL837225 (testes)                                                                                                                                                                                          |
| 215-8  | 168948-174567   | NKp30       | 170766     | 6p21.3    | DT                | 91% DT447366(spleen), 99% EL837225 (testes)                                                                                                                                                                                                 |
| 215-9  | 205264-205539   | NKp30       | 138657     | 6p21.3    | DT                | 86% DT447366 (spleen)                                                                                                                                                                                                                       |
| 215-10 | 209299-221397   | NKp30       | 170769     | 6p21.3    | DT                | 98% EL837335 (testes), 91% DT447366 (spleen)                                                                                                                                                                                                |
| 215-11 | 224116-248685   | NKp30       | 170770     | 6p21.3    | DT                | 99% DT447366 (spleen)                                                                                                                                                                                                                       |
| 215-12 | 269377-275917   | NKp30       | 466773     | 6p21.3    | BX                | 100% match to BX773925 (egg)                                                                                                                                                                                                                |
| 13     | 283772-288419   | B3GAT1-like | 350405     | 11q25     |                   | beta-1,3-glucuronyltransferase 1                                                                                                                                                                                                            |
| 14     | 432001-504608   | BSN         | 170777     | 3p21.31   |                   | bassoon (presynaptic cytomatrix protein)                                                                                                                                                                                                    |
| 15     | 526523-528650   | BSN-like    | 466774     |           |                   | protein basoon-like                                                                                                                                                                                                                         |
| 16     | 855898-891267   | DAG1        | 170780     | 3p21.31   |                   | dystroglycan 1 (dystrophin-associated glycoprotein 1)                                                                                                                                                                                       |
| 17     | 952064-980011   | USP4        | 170783     | 3p21.3    |                   | ubiquitin specific peptidase 4 (proto-oncogene)                                                                                                                                                                                             |
| 18     | 995022-999682   | GPX1        | 454592     | 3p21.3    |                   | glutathione peroxidase 1                                                                                                                                                                                                                    |
| 19     | 1004872-1020027 | RHOA        | 149865     | 3p21.3    |                   | ras homolog gene family, member A                                                                                                                                                                                                           |
| 20     | 1163158-1174921 | GMPPB       | 454601     | 3p21.31   |                   | GDP-mannose pyrophosphorylase B                                                                                                                                                                                                             |
| 21     | 1180654-1198431 | IP6K1       | 170800     | 3p21.31   |                   | inositol hexakisphosphate kinase 1                                                                                                                                                                                                          |
| 22     | 1268580-1287897 | CDHR4       | 170804     | 3p21.31   |                   | cadherin-related family member 4                                                                                                                                                                                                            |
| 23     | 1296340-1299408 | TLR9        | 350411     | 3p21.3    |                   | toll-like receptor 9                                                                                                                                                                                                                        |
| 24     | 1303105-1313373 | TRAIIP      | 350388     | 3p21.31   |                   | TRAF interacting protein                                                                                                                                                                                                                    |
| 25     | 1385332-1390848 | C3orf54     | 293751     | 3p21.31   |                   |                                                                                                                                                                                                                                             |

Online resource 3. Genomic coordinates of NKp30 in the Xenopus scaffolds

Scaffold-88: 3,020,139bp

|    | Position (bp) | gene symbol | Protein ID | human chr      | Type <sup>1</sup> | Gene description/EST for NKp30                                            |
|----|---------------|-------------|------------|----------------|-------------------|---------------------------------------------------------------------------|
| 1  | 55318-84426   | TNRC6B      | 163058     | 22q13.1        |                   | trinucleotide repeat containing 6B                                        |
| 2  | 107991-116671 | ADSL        | 451771     | 22q13.2        |                   | adenylosuccinate lyase                                                    |
| 3  | 123789-145333 | SGSM3       | 271451     | 22q13.1-q13.2  |                   | small G protein signaling modulator 3                                     |
| 4  | 149696-155729 | CHAD        | 271472     | 17q21.33       |                   | chondroadherin                                                            |
| 5  | 156637-167119 | RANGAP1     | 163063     | 22q13          |                   | Ran GTPase activating protein 1                                           |
| 6  | 173261-202155 | ZC3H7B      | 271466     | 22q13.2        |                   | zinc finger CCCH-type containing 7B                                       |
| 7  | 217888-223875 | TEF         | 208802     | 22q13.2        |                   | thyrotrophic embryonic factor                                             |
| 8  | 244085-246726 | PKN2        | 327775     | 1p22.2         |                   | protein kinase N2                                                         |
| 9  | 280977-293299 | GALR2       | 327802     | 17q25.3        |                   | galanin receptor 2                                                        |
| 10 | 349153-400242 | TOM1        | 208803     | 22q13.1        |                   | target of myb1                                                            |
| 11 | 402220-412313 | HMGXB4      | 163074     | 22q13.1        |                   | HMGXB4 and Name: HMG box domain containing 4                              |
| 12 | 418993-426545 | ANKRD54     | 327650     | 22q13.1        |                   | ankyrin repeat domain 54                                                  |
| 13 | 431466-441809 | EIF3L       | 451784     | 22q            |                   | eukaryotic translation initiation factor 3, subunit L                     |
| 14 | 443205-486752 | MCALL1      | 451786     | 22q13.1        |                   | MICAL-like 1                                                              |
| 15 | 492687-499703 | C22orf23    | 292767     | 22q13.1        |                   | chromosome 22 open reading frame 23; EVG1                                 |
| 16 | 499702-504092 | POLR2F      | 271486     | 22q13.1        |                   | polymerase (RNA) II (DNA directed) polypeptide F                          |
| 17 | 512058-518986 | SOX10       | 451789     | 22q13.1        |                   | SRY (sex determining region Y)-box 10                                     |
| 18 | 559579-580477 | BAIAP2L2    | 327814     | 22q13.1        |                   | BAI1-associated protein 2-like 2                                          |
| 19 | 589335-609781 | PLA2G6      | 451790     | 22q13.1        |                   | phospholipase A2, group VI                                                |
| 20 | 621288-626606 | MAFF        | 163085     | 22q13.1        |                   | v-maf musculoaponeurotic fibrosarcoma oncogene homolog F                  |
| 21 | 638353-678699 | TMEM184B    | 163086     | 22q12          |                   | transmembrane protein 184B                                                |
| 22 | 692261-732951 | CSNK1E      | 163088     | 22q13.1        |                   | casein kinase 1, epsilon                                                  |
| 23 | 755336-756936 | KCNJ4       | 451791     | 22q13.1        |                   | potassium inwardly-rectifying channel, subfamily J, member 4              |
| 24 | 811924-817996 | KDEL3       | 148351     | 22q13.1        |                   | KDEL (Lys-Asp-Glu-Leu) endoplasmic reticulum protein retention receptor 3 |
| 25 | 845791-849259 | TNIK        | 163095     | 3p26.31        |                   | TRAF2 and NCK interacting kinase                                          |
| 26 | 853890-854186 | nog4        | 18973      | 17q22 paralog? |                   | noggin4                                                                   |
| 27 | 855476-871597 | GCAT        | 327659     | 22q13.1        |                   | glycine C-acetyltransferase                                               |
| 28 | 878989-879330 | H1F0        | 109293     | 22q13.1        |                   | H1 histone family, member 0                                               |
| 29 | 897679-908475 | TRIOBP      | 327579     | 22q13.1        |                   | TRIO and F-actin binding protein                                          |
| 30 | 922457-943491 | SRRM2?      | 163100     | 16p13.3        |                   | serine/arginine repetitive matrix 2                                       |
| 31 | 944169-954045 | NOL12       | 148353     | 22q13.1        |                   | nucleolar protein 12                                                      |
| 32 | 954084-972241 | ADAP1       | 225007     | 7p22.3         |                   | ArfGAP with dual PH domains 1                                             |

Online resource 3. Genomic coordinates of NKp30 in the Xenopus scaffolds

|    |                 |             |        |             |  |                                                                                |
|----|-----------------|-------------|--------|-------------|--|--------------------------------------------------------------------------------|
| 33 | 979371-987199   | LGALS1      | 148356 | 22q13.1     |  | lectin, galactoside-binding, soluble, 1                                        |
| 34 | 994368-1009091  | LGALS1      | 148357 | 22q13.1     |  | lectin, galactoside-binding, soluble, 1                                        |
| 35 | 1027775-1040978 | LGALS1      | 292772 | 22q13.1     |  | lectin, galactoside-binding, soluble, 1                                        |
| 36 | 1048074-1054603 | LGALS1      | 163108 | 22q13.1     |  | lectin, galactoside-binding, soluble, 1                                        |
| 37 | 1068659-1080149 | SH3BP1      | 327728 | 22q13.1     |  | SH3-domain binding protein 1                                                   |
| 38 | 1108125-1124159 | GGA1        | 327829 | 22q13.31    |  | golgi-associated, gamma adaptin ear containing, ARF binding protein 1          |
| 39 | 1136061-1138851 | LGALS2      | 163110 | 22q13.1     |  | lectin, galactoside-binding, soluble, 2                                        |
| 40 | 1269635-1272443 | ELFN2       | 451800 | 22q13.1     |  | extracellular leucine-rich repeat and fibronectin type III domain containing 2 |
| 41 | 1314787-1336565 | CYTH2       | 327670 | 19q13.33    |  | cytohesin 2                                                                    |
| 42 | 1358871-1384147 | RAC2        | 475981 | 22q13.1     |  | ras-related C3 botulinum toxin substrate 2                                     |
| 43 | 1405028-1406239 | SSTR3       | 327701 | 22q13.1     |  | somatostatin receptor 3                                                        |
| 44 | 1470189-1495484 | TMPRSS6     | 464718 | 22q12.3     |  | transmembrane protease, serine 6                                               |
| 45 | 1498089-1503584 | KCTD17      | 14752  | 22q12.3     |  | potassium channel tetramerisation domain containing 17                         |
| 46 | 1505535-1512725 | MPST        | 163119 | 22q13.1     |  | mercaptopyruvate sulfurtransferase                                             |
| 47 | 1556398-1564872 | TST         | 163123 | 22q13.1     |  | thiosulfate sulfurtransferase (rhodanese)                                      |
| 48 | 1578379-1605830 | CSF2RB      | 451803 | 22q13.1     |  | colony stimulating factor 2 receptor, beta, low-affinity                       |
| 49 | 1615529-1638662 | NCF4        | 148362 | 22q13.1     |  | neutrophil cytosolic factor 4, 40kDa                                           |
| 50 | 1658714-1677150 | PVALV       | 148364 | 22q12-q13.1 |  | parvalbumin                                                                    |
| 51 | 1688532-1706043 | IFT27       | 451804 | 22q13.1     |  | intraflagellar transport 27 homolog (Chlamydomonas)                            |
| 52 | 1729296-1782366 | CACNG2      | 271449 | 22q13.1     |  | calcium channel, voltage-dependent, gamma subunit 2                            |
| 53 | 1809705-1822472 | EIF3D       | 148366 | 22q13.1     |  | eukaryotic translation initiation factor 3, subunit D                          |
| 54 | 1825333-1831291 | MUSTN1      | 451808 | 3           |  | musculoskeletal, embryonic nuclear protein 1                                   |
| 55 | 1840257-1853219 | TMEM110-MUS | 199241 | 3           |  | TMEM110-MUSTN1 readthrough                                                     |
| 56 | 1860469-1891127 | SFMBT1      | 327822 | 3p21.1      |  | Scm-like with four mbt domains 1                                               |
| 57 | 1939871-1956718 | RFT1        | 475987 | 3p21.1      |  | RFT1 homolog (S. cerevisiae)                                                   |
| 58 | 2020934-2033178 | PRKCD       | 271492 | 3p21.31     |  | protein kinase C, delta                                                        |
| 59 | 2034703-2055023 | PFKFB4      | 451813 | 3p22-p21    |  | 6-phosphofructo-2-kinase/fructose-2,6-biphosphatase 4                          |
| 60 | 2118529-2130605 | WASL        | 451814 | 7q31.3      |  | Wiskott-Aldrich syndrome-like                                                  |
| 61 | 2158165-2175889 | ATRIP       | 451816 | 3p21.31     |  | ATR interacting protein                                                        |
| 62 | 2185665-2188143 | BTG1        | 292779 | 12q22       |  | B-cell translocation gene 1, anti-proliferative                                |
| 63 | 2235401-2260694 | IPPK        | 271516 | 9q22.31     |  | inositol 1,3,4,5,6-pentakisphosphate 2-kinase                                  |
| 64 | 2289075-2302416 | ECM2        | 163153 | 9q22.3      |  | extracellular matrix protein 2, female organ and adipocyte specific            |
| 65 | 2321556-2332848 | ASPN        | 327585 | 9q22        |  | asporin                                                                        |
| 66 | 2350549-2353158 | OMD         | 199249 | 9q22.31     |  | osteomodulin                                                                   |

Online resource 3. Genomic coordinates of NKp30 in the Xenopus scaffolds

|      |                 |         |        |         |            |                                                                                                                                                                                                                                                 |
|------|-----------------|---------|--------|---------|------------|-------------------------------------------------------------------------------------------------------------------------------------------------------------------------------------------------------------------------------------------------|
| 67   | 2371700-2375287 | OGN     | 327661 | 9q22    |            | osteoglycin                                                                                                                                                                                                                                     |
| 68   | 2403512-2429465 | NOL8    | 512865 | 9q22.31 |            | nucleolar protein 8                                                                                                                                                                                                                             |
| 69   | 2462656-2511391 | IARS    | 451824 | 9q21    |            | isoleucyl-tRNA synthetase                                                                                                                                                                                                                       |
| 70   | 2761382-2851564 | ATP2B2  | 199252 | 3p25.3  |            | ATPase, Ca++ transporting, plasma membrane 2                                                                                                                                                                                                    |
| 71   | 2872484-2911770 | FANCD2  | 327776 | 3p26    |            | Fanconi anemia, complementation group D2                                                                                                                                                                                                        |
| 72   | 2914797-2915547 | C3orf24 | 271423 | 3p25.3  |            |                                                                                                                                                                                                                                                 |
| 73   | 2917929-2926887 | TMEM111 | 148375 | 3       |            | transmembrane protein 111                                                                                                                                                                                                                       |
| 88-2 | 2955788-2958378 | NKp30   | 163171 | 6p21.3  | New (88-2) | no match                                                                                                                                                                                                                                        |
| 88-1 | 3005933-3014759 | NKp30   | 163176 | 6p21.3  | ES         | 91% ES685492 (spleen); ES685490 (eye); DR850889 (ovary); DN098981 (Ovary); CX747707 (whole embryo); 89% CX445352 (whole embryo); CX966132 (intestine); AL878396 (egg); 93% CX747706 ( whole embryo); 92% DR850888 (ovary); AL961664 (gastrula); |

**Scaffold-3675: 10,658bp**

|        | Position (bp) | gene symbol | Protein ID | human chr | Type <sup>1</sup> | Gene description/EST for NKp30 |
|--------|---------------|-------------|------------|-----------|-------------------|--------------------------------|
| 3675-1 | 2198-4041     | NKp30       | 193035     | 6p21.3    | DT                | 90% DT447366 (spleen)          |

**Scaffold-15172: 3,739bp**

|         |        |       |        |        |    |                                                                                                                                                                                                                       |
|---------|--------|-------|--------|--------|----|-----------------------------------------------------------------------------------------------------------------------------------------------------------------------------------------------------------------------|
| 15172-1 | 40-595 | NKp30 | 195782 | 6p21.3 | ES | 98% ES685492 (eye); 96% ES685490 (eye), DR850889 (ovary), DN098981 (ovary), CX747707 (whole embryo), AL878396 (egg); 94% CX747706 (whole embryo), CX966132 (intestine); 93% CX445352 (whole embryo), DR850888 (Ovary) |
|---------|--------|-------|--------|--------|----|-----------------------------------------------------------------------------------------------------------------------------------------------------------------------------------------------------------------------|

**Scaffold-3771: 10,314bp**

|        |          |       |        |        |    |                                                                                                                                                                                                                                        |
|--------|----------|-------|--------|--------|----|----------------------------------------------------------------------------------------------------------------------------------------------------------------------------------------------------------------------------------------|
| 3771-1 | 683-2204 | NKp30 | 193089 | 6p21.3 | ES | 95% ES685492 (eye), ES685490 (eye), DR850889 (ovary), DN098981 (ovary), CX747707 (whole embryo), AL878396 (egg), CX445352 (whole embryo), CX966132 (intestine); 94% C7447706 (whole embryo); 93% DR850888 (ovary), AL961664 (gastrula) |
|--------|----------|-------|--------|--------|----|----------------------------------------------------------------------------------------------------------------------------------------------------------------------------------------------------------------------------------------|

\* indicate these gene models contain two IgSF exons, presumably assembly error.

<sup>1</sup>: Nkp30 types based on the amino acid sequences
