# Supplementary material
Source: PubMed Central journal article supplement (PMC3709836)

# Online Resource 4a

## ML tree

Using nucleotide sequences of V domains

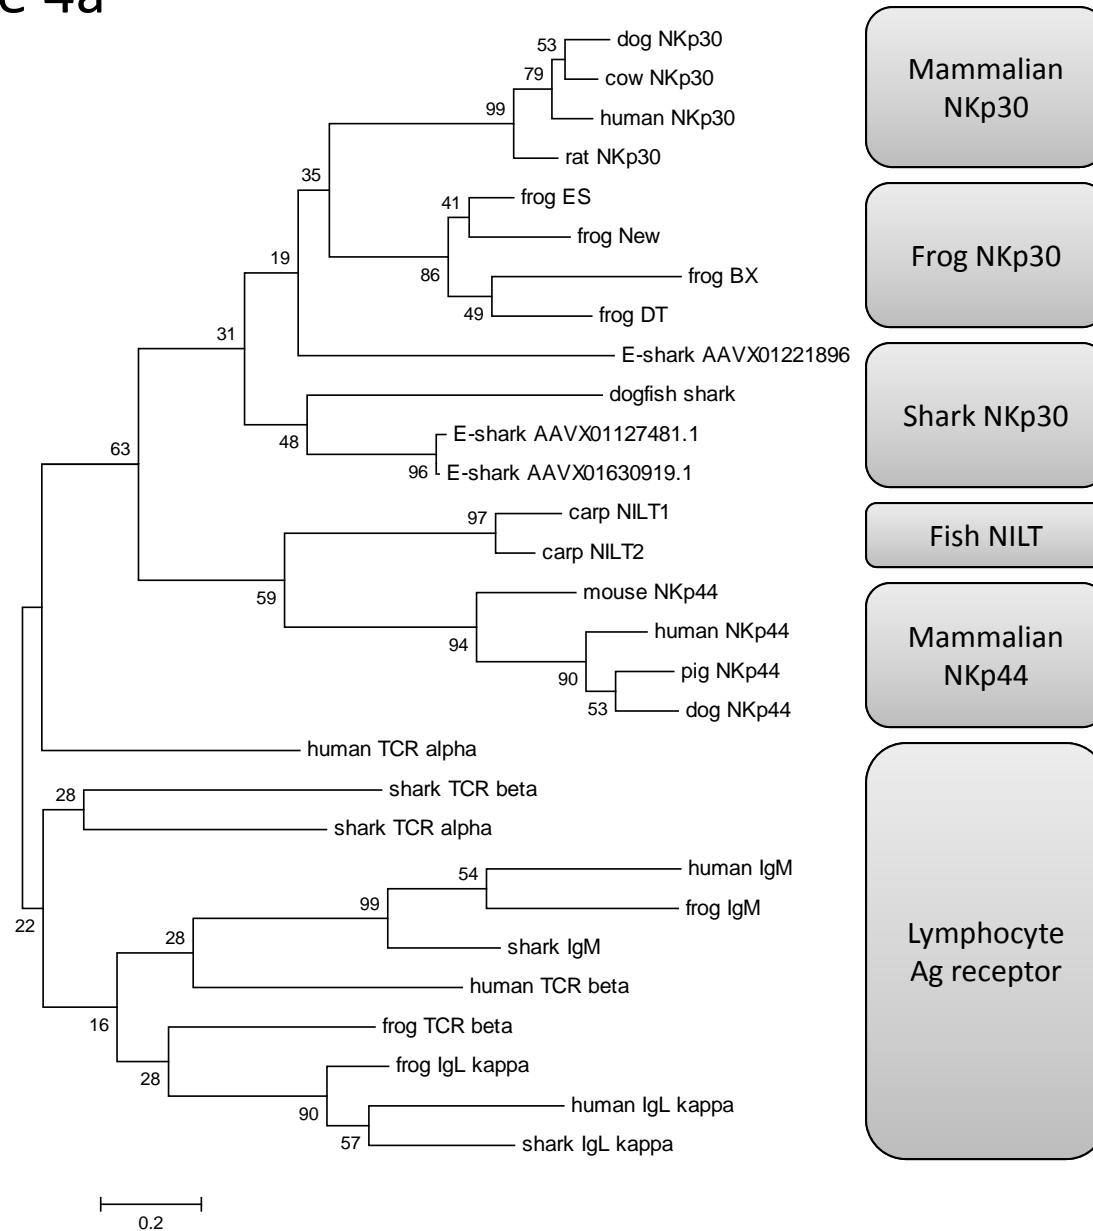

Mammalian NKp30

Frog NKp30

Shark NKp30

Fish NILT

Mammalian NKp44

Lymphocyte Ag receptor

# Online Resource 4b

## ME tree

Using nucleotide sequences of V domains

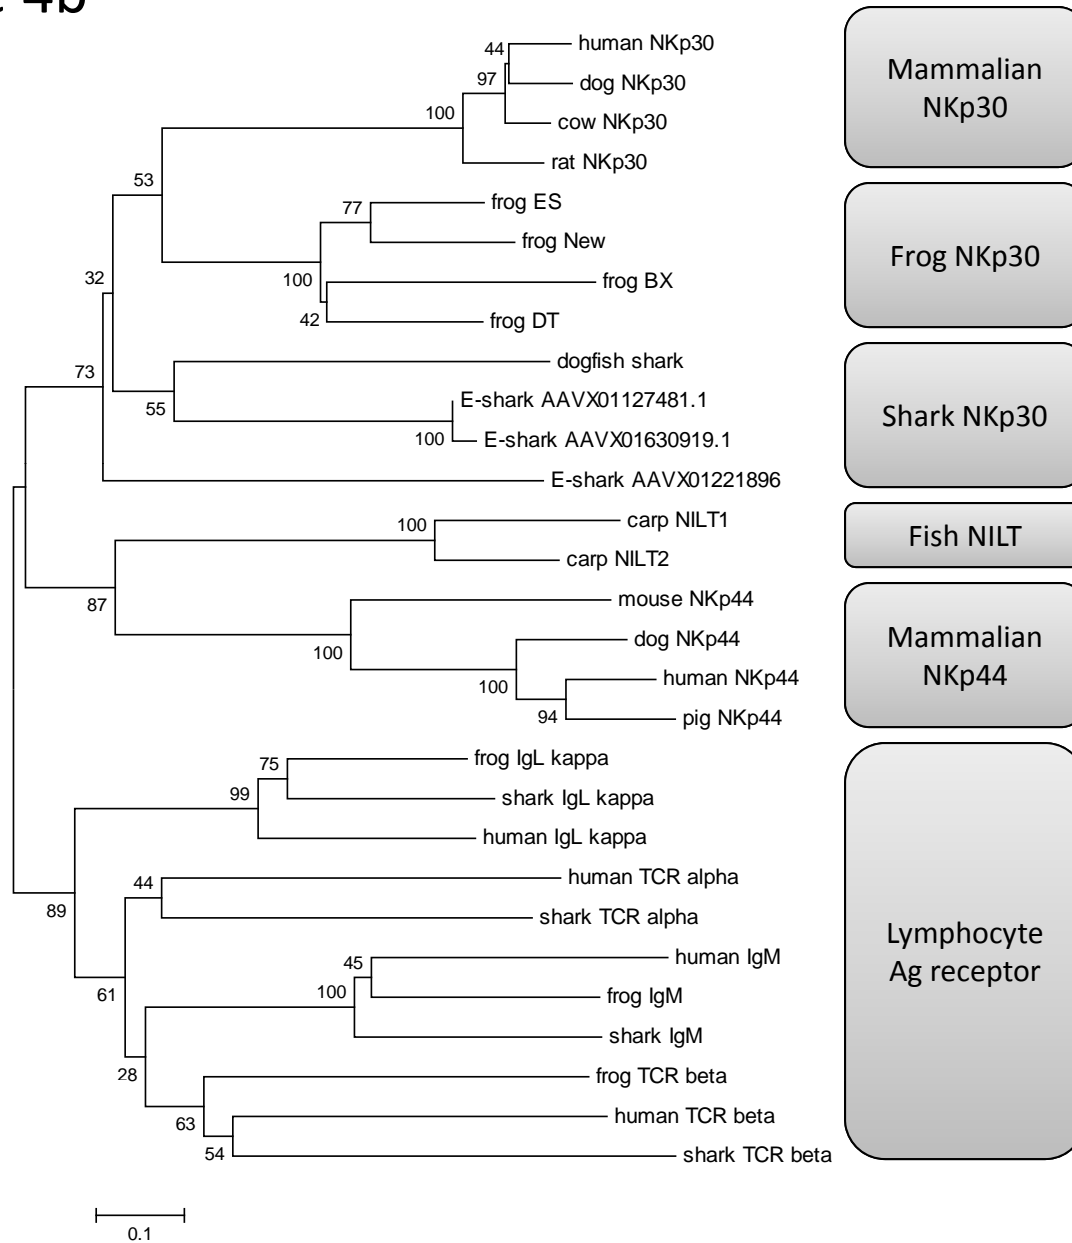

Supplement: NIHMS380827-supplement-4.pdf [file NIHMS380827-supplement-4.pdf]
